# Supplementary material
Source: Springer Nature journal article supplement (https://www.springermedizin.de/resource/supplementary/12913_2012_2122_MOESM1_ESM.pdf/9529662)

**ART cycles  
(1000's)**

**Medicare benefits  
(\$AUD Millions)**

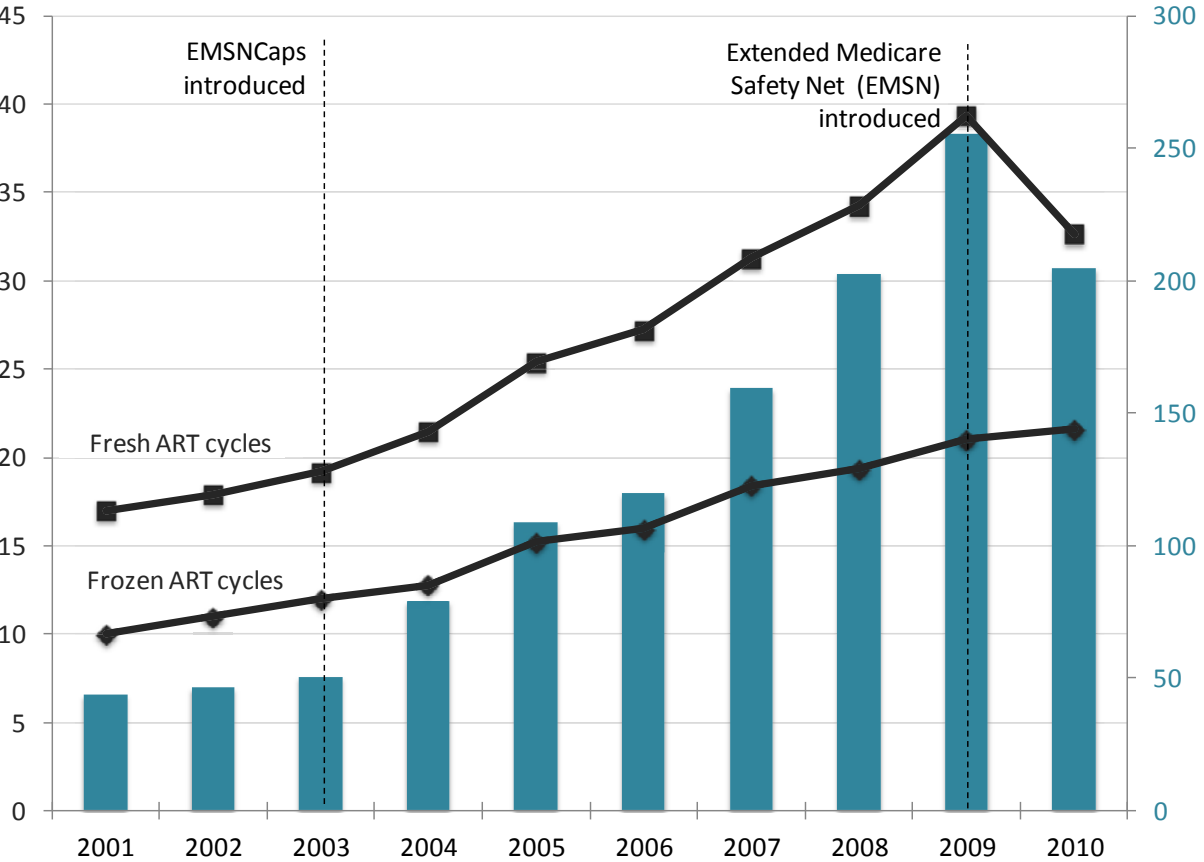

Supplement: MOESM1 [file 9529662]
